# Supplementary material for: Fourth class of convex equilateral polyhedron with polyhedral symmetry related to fullerenes and viruses
Source: HighWire-hosted journal article supplement (doi:10.1073/pnas.1310939111), 2014-02-10

$T=4$   
(2,0)

1-cyan: 1

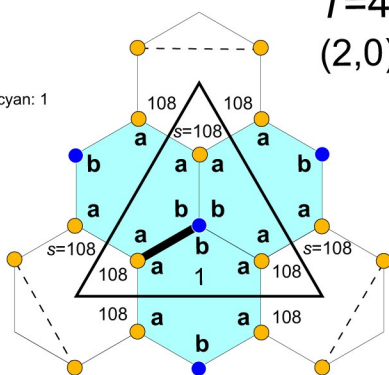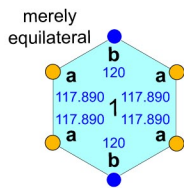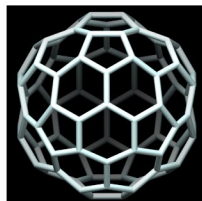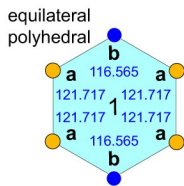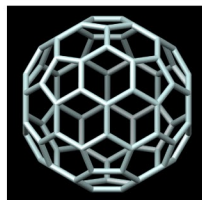

$T=7$   
(2,1)

1-cyan: 3

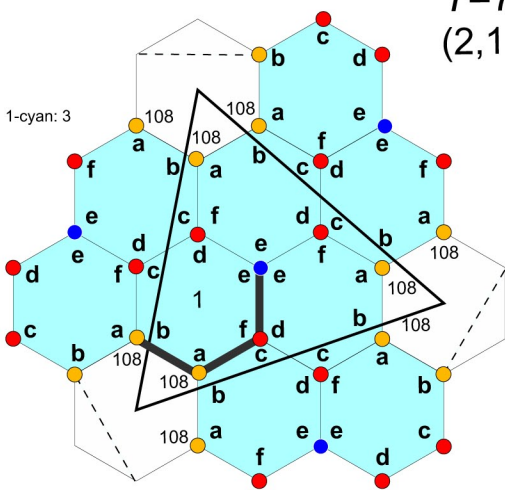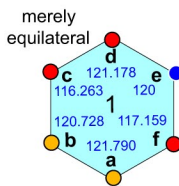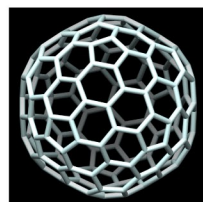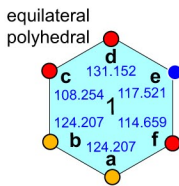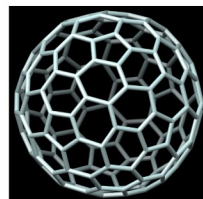

$T=9$   
(3,0)

1-cyan: 1  
2-green: 1

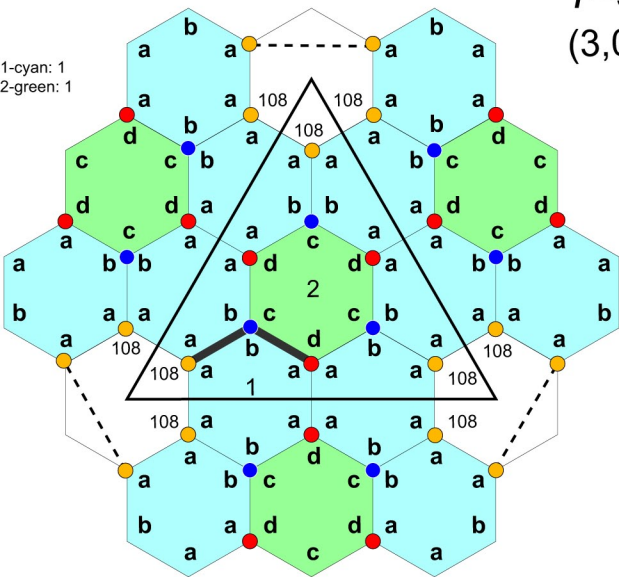

merely equilateral

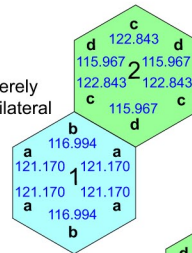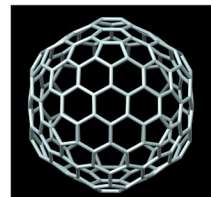

equilateral polyhedral

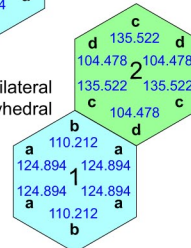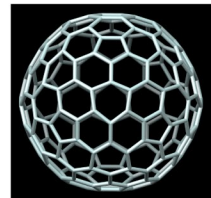

T=12

1-red: 1  
2-cyan: 1  
3-yellow: 0

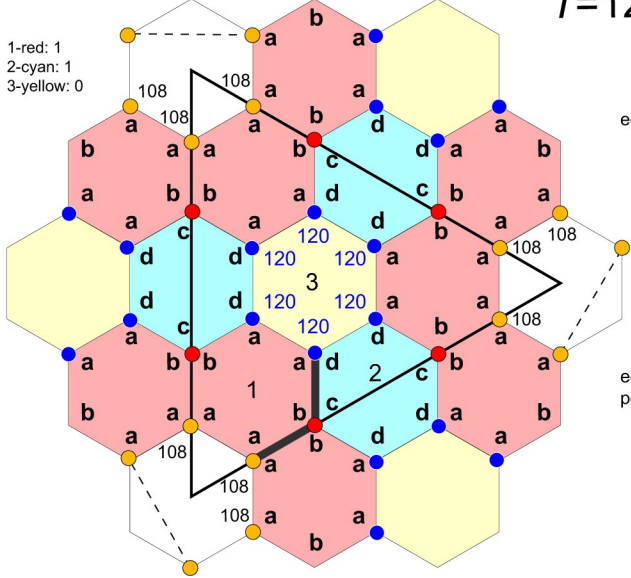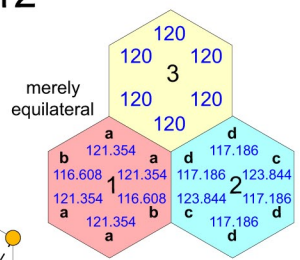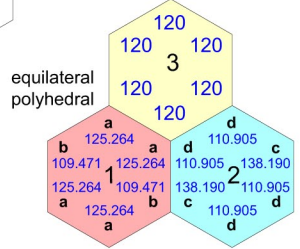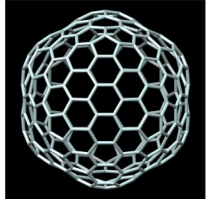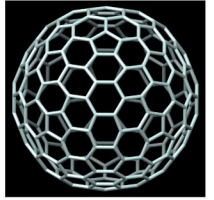

T=13

1-cyan: 3  
2-green: 3

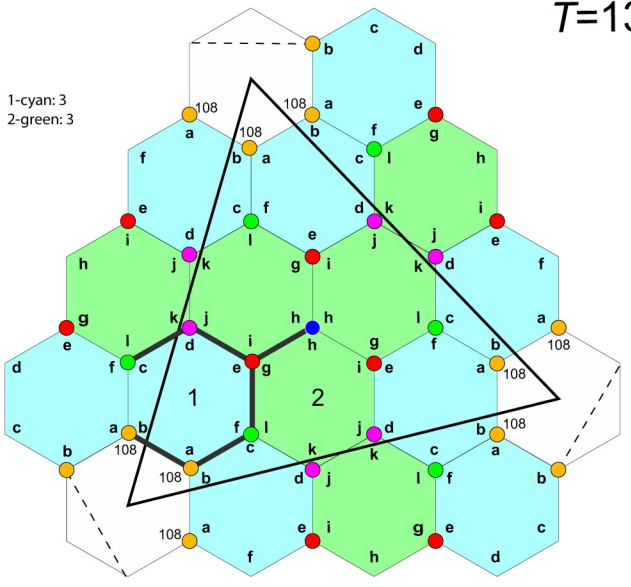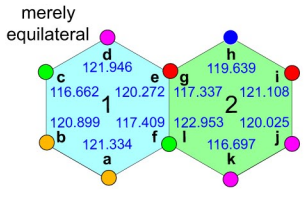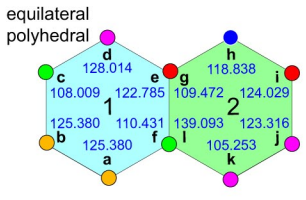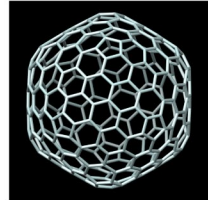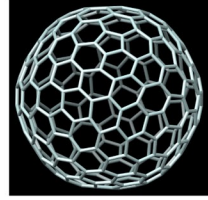

T=16

1-cyan: 1  
2-green: 1  
3-pink: 2

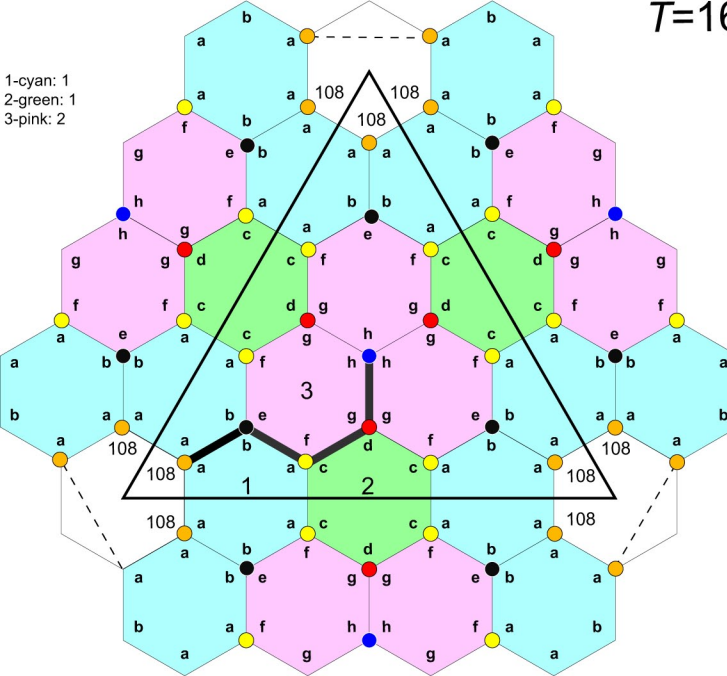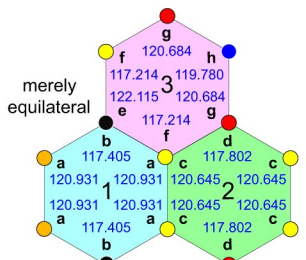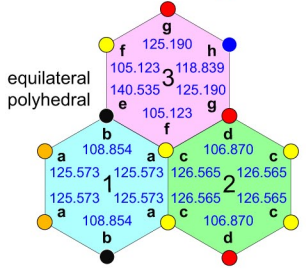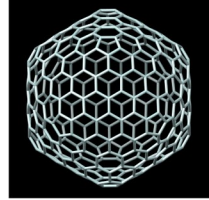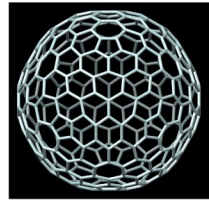

1-cyan: 3  
 2-green: 3  
 3-pink: 3

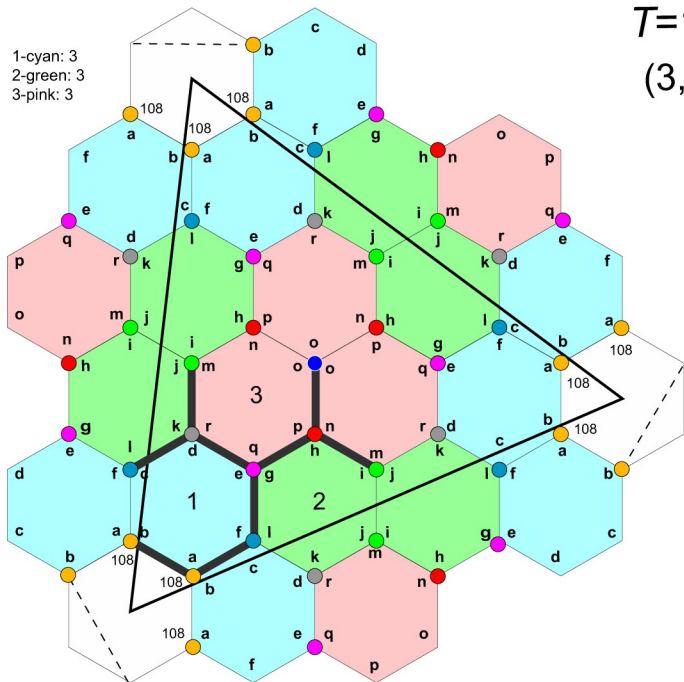

$T=19$   
 (3,2)

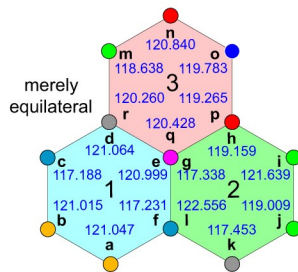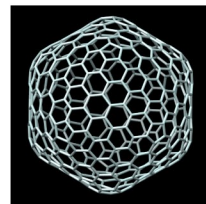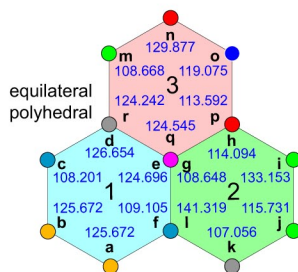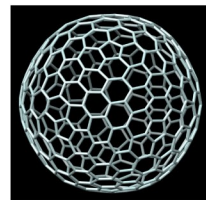

1-cyan: 3  
 2-green: 3  
 3-yellow: 3  
 4-pink: 1

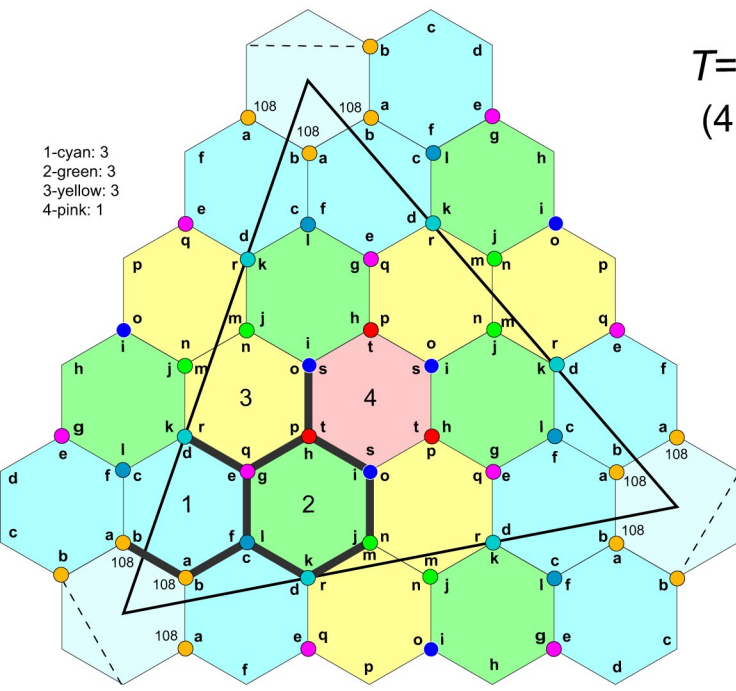

$T=21$   
 (4,1)

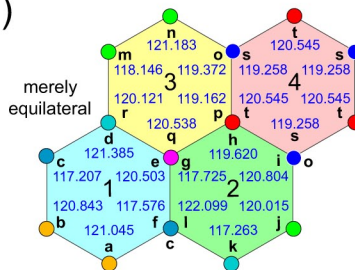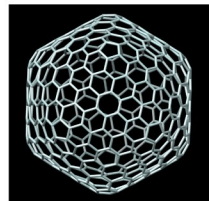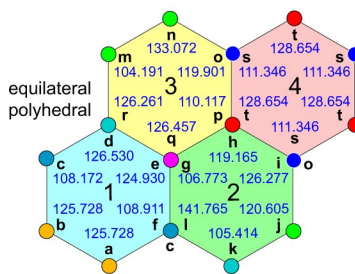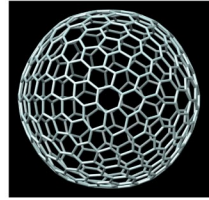



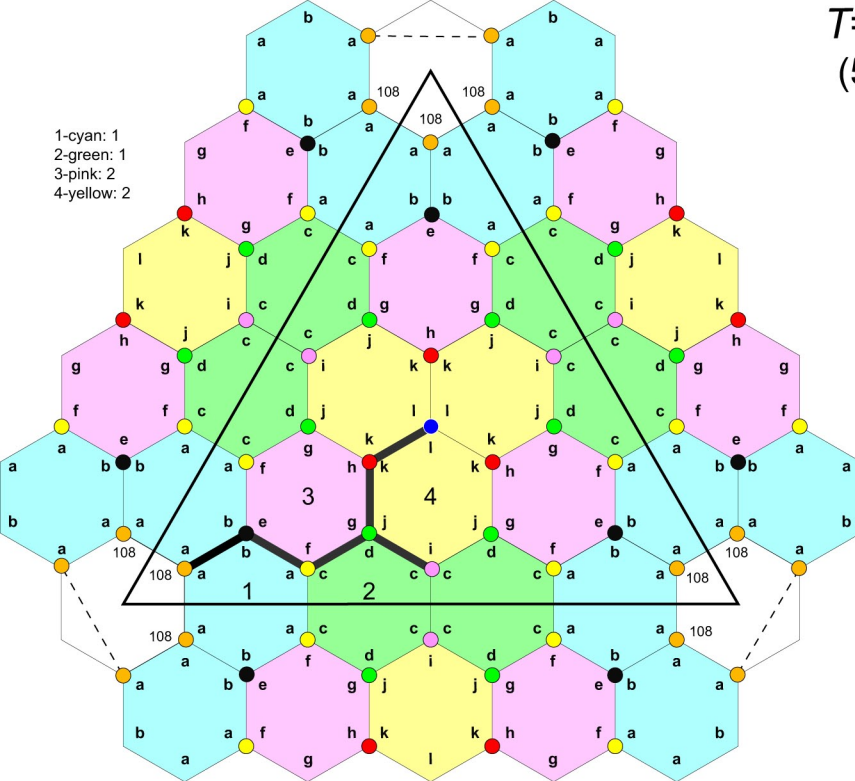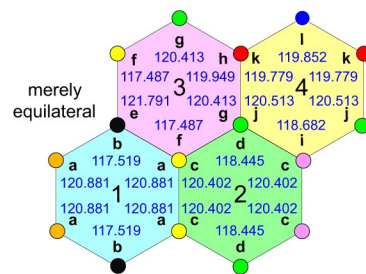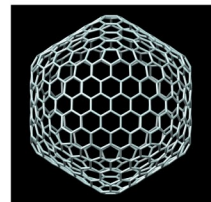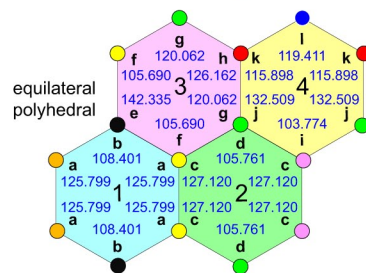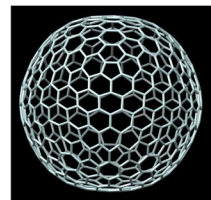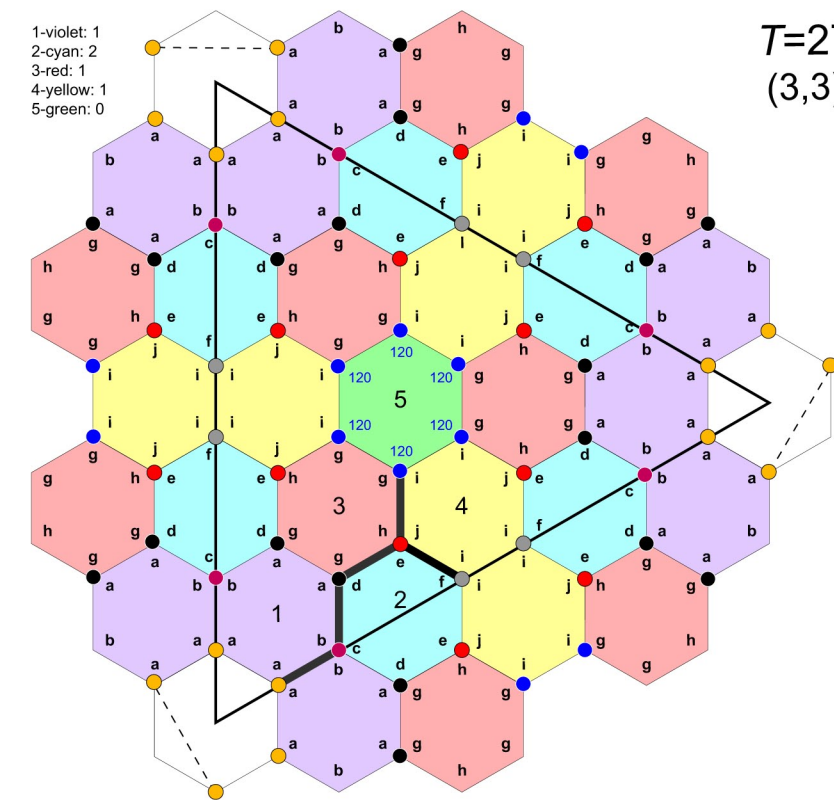

$T=27$   
(3,3)

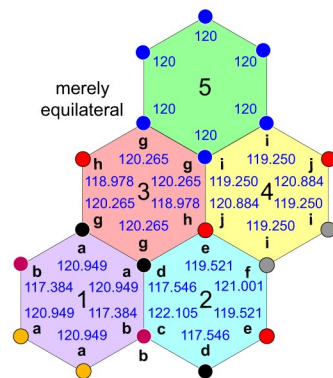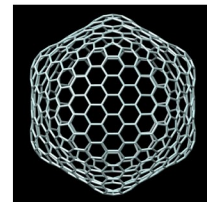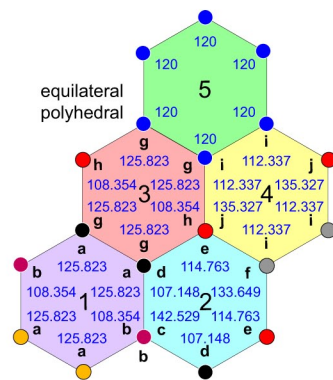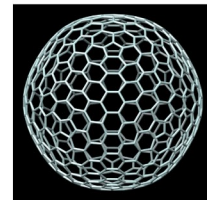



- 1-cyan: 3
- 2-green: 3
- 3-yellow: 2
- 4-red: 3
- 5-lt green: 3

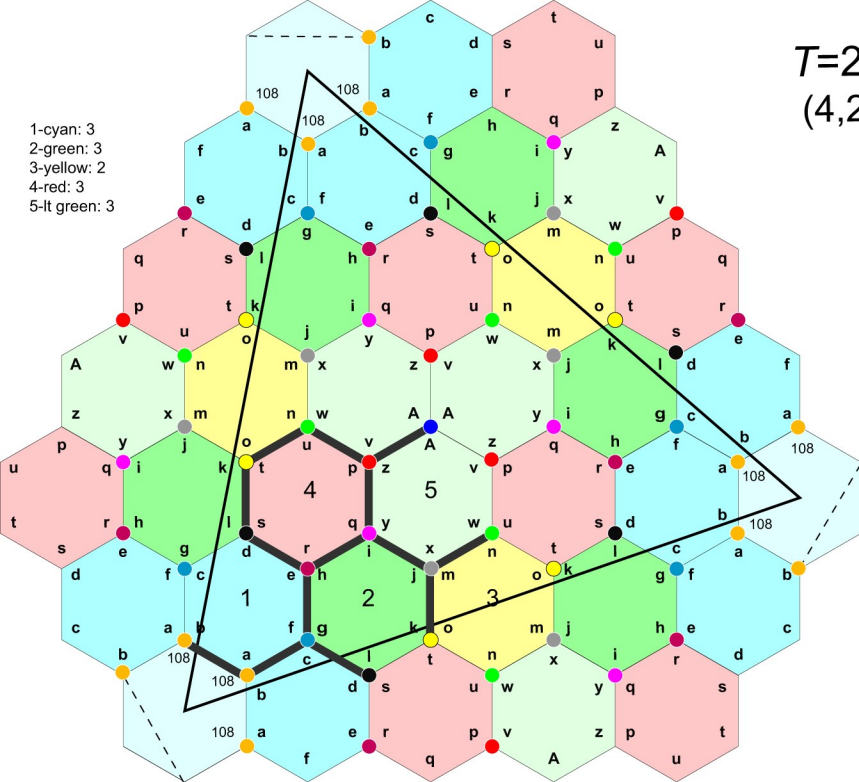

$T=28$   
(4,2)

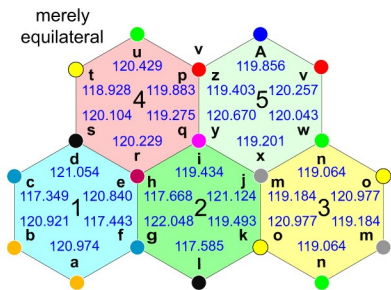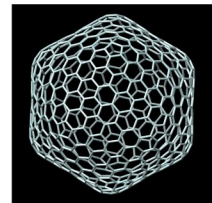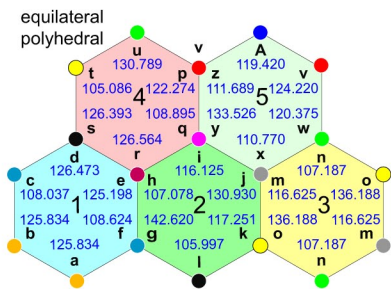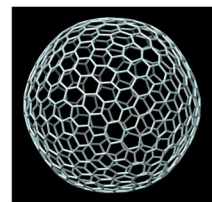

- 1. cyan: 3
- 2. green: 3
- 3. pink: 3
- 4. yellow: 3
- 5. orange: 3

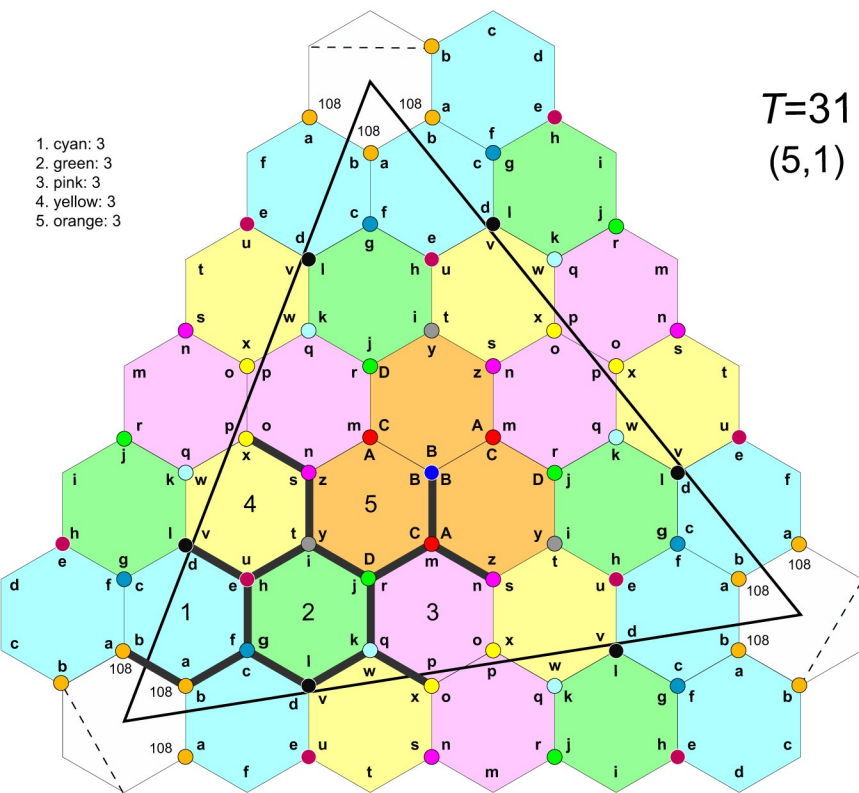

$T=31$   
(5,1)

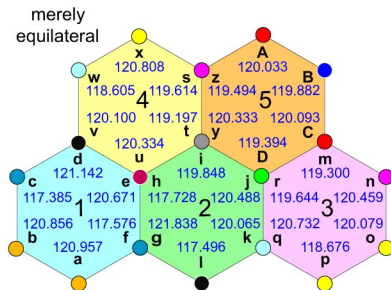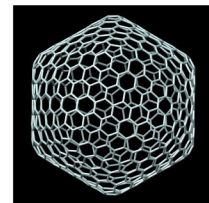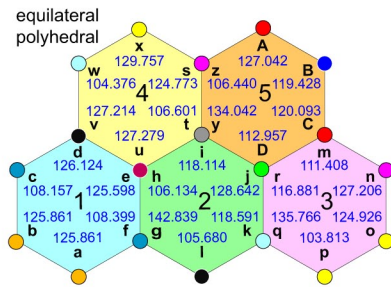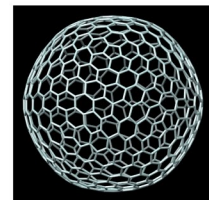

- 1 cyan: 1
- 2 green: 1
- 3 blue: 2
- 4 violet: 2
- 5 yellow: 3
- 6 pink: 1

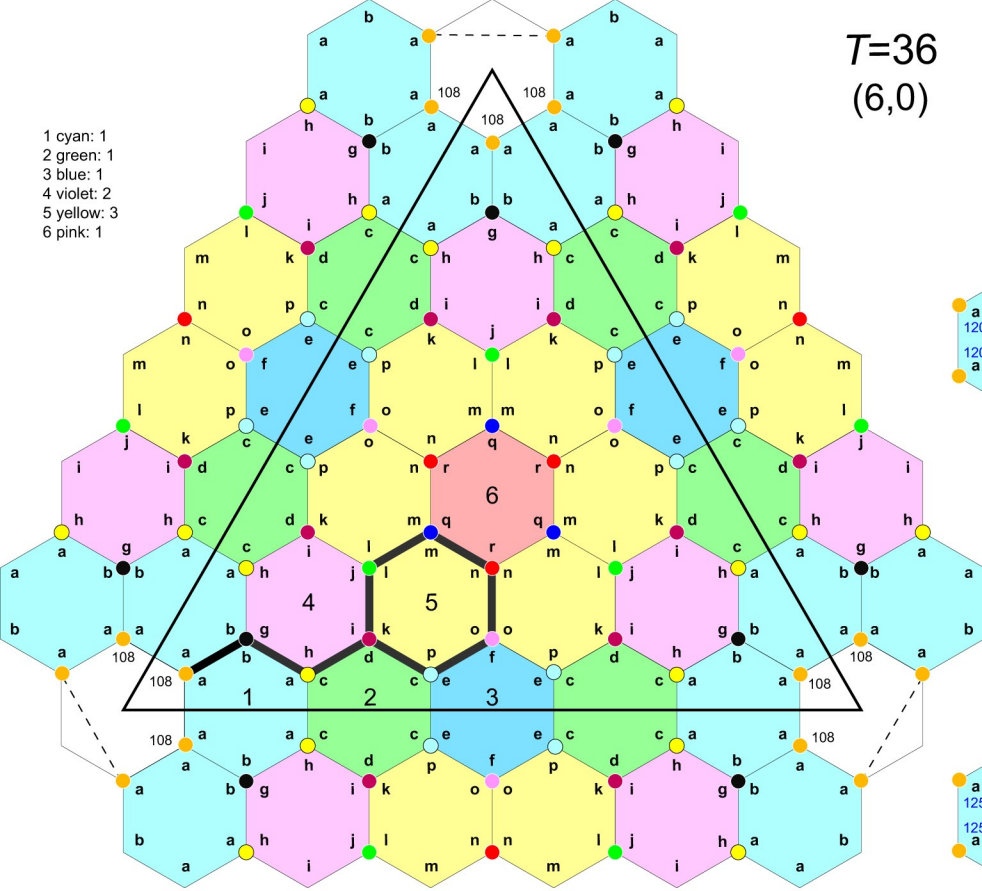

$T=36$   
(6,0)

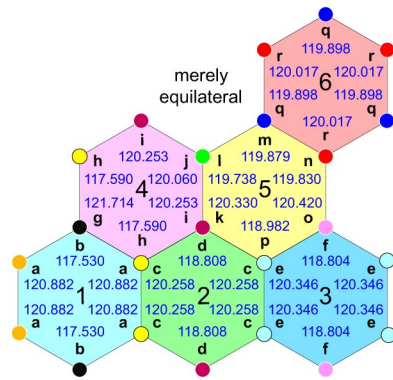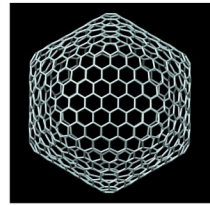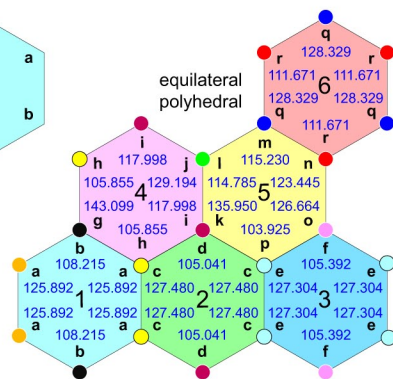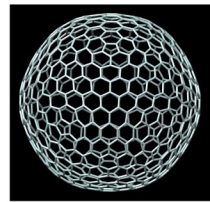

- 1-cyan: 3
- 2-green: 3
- 3-violet: 3
- 4-yellow: 3
- 5-orange: 3
- 6-lt green: 3

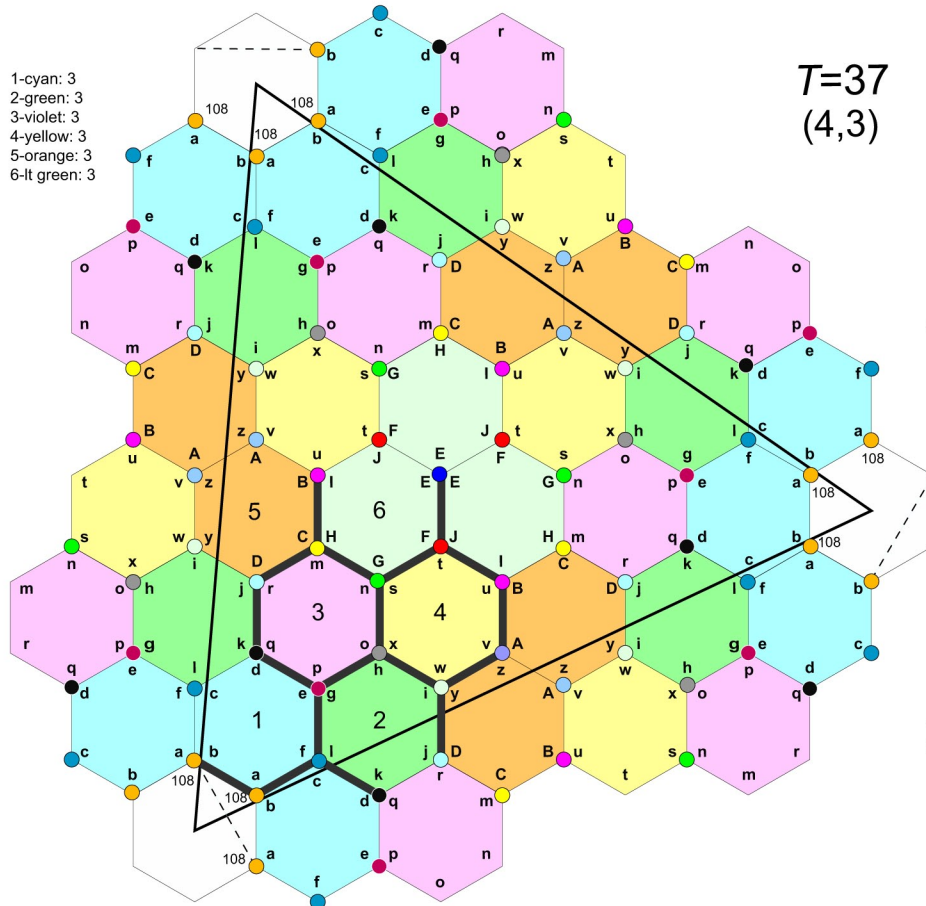

$T=37$   
(4,3)

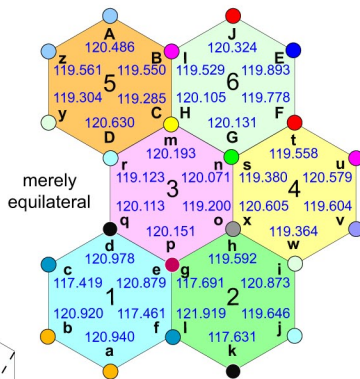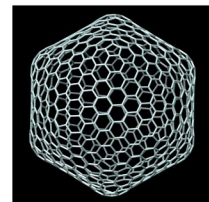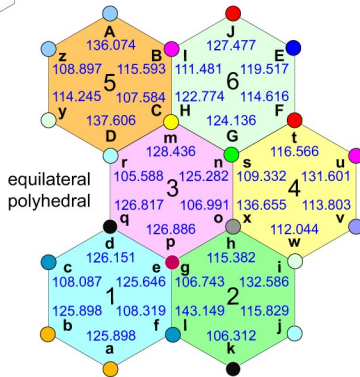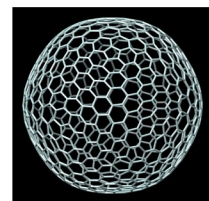



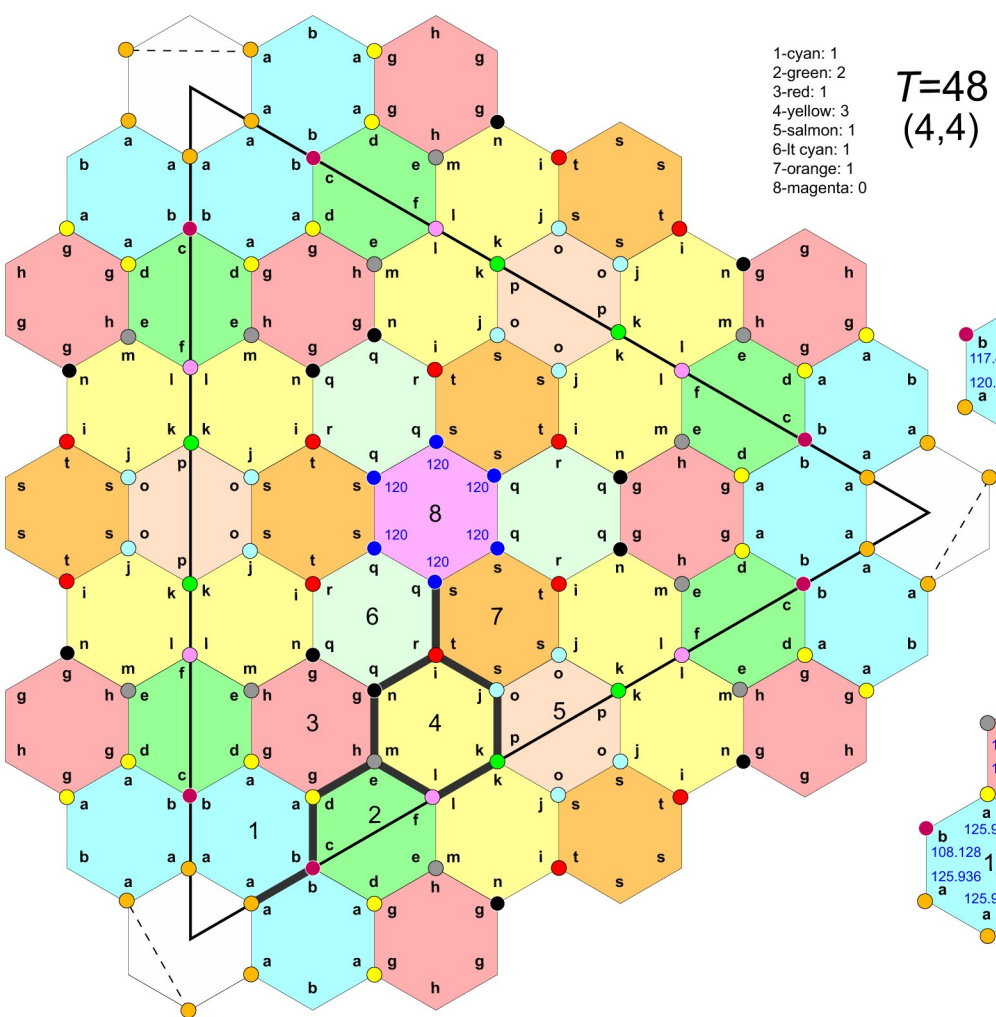

$T=48$   
 (4,4)

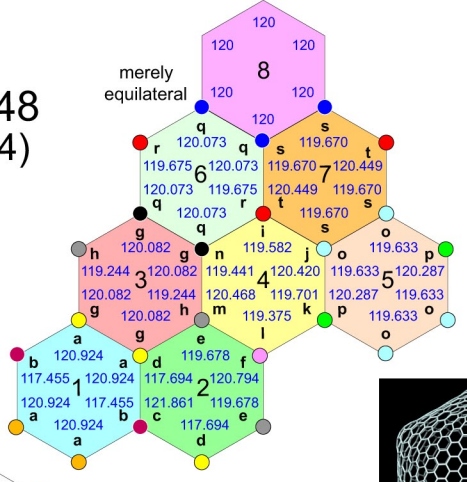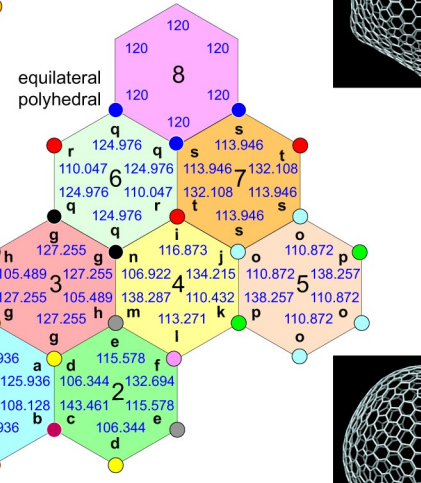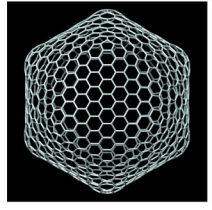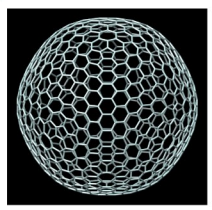

$T=49$   
 (7,0)

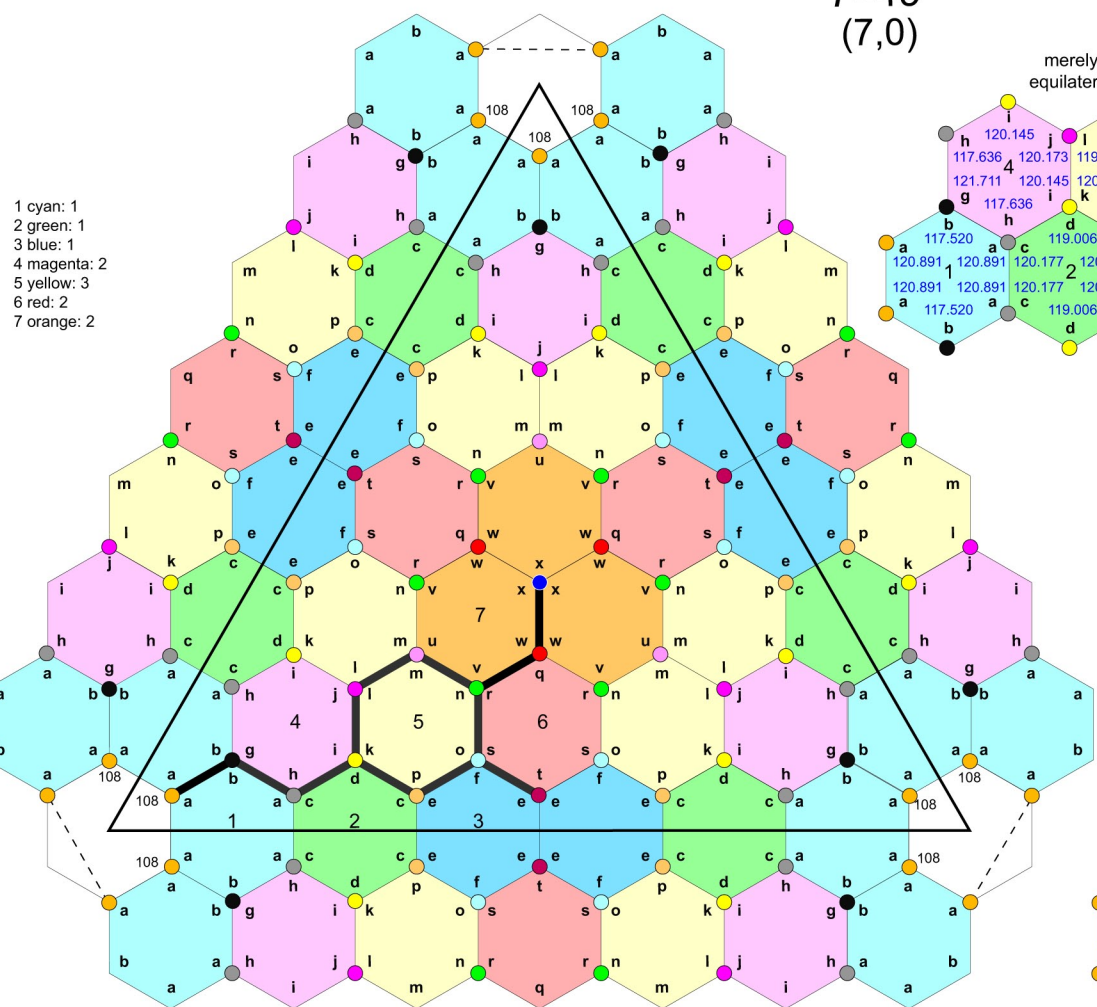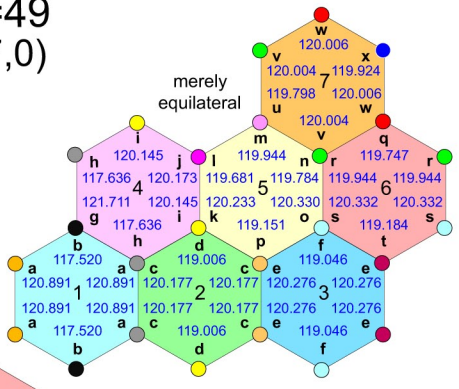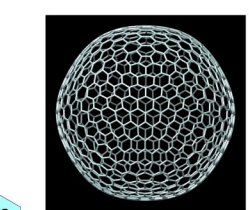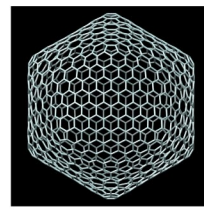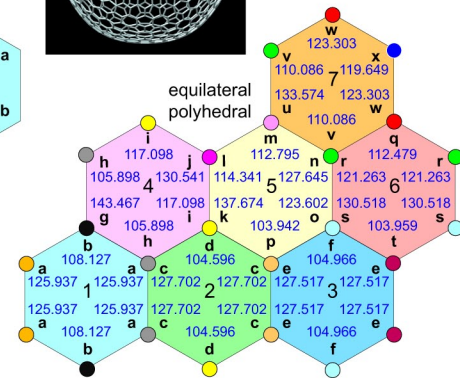

Supplement: sfig02.pdf [file sfig02.pdf]
